# Supplementary material for: Convolutional neural network-based colloidal self-assembly state classification
Source: Royal Society of Chemistry journal article supplement (doi:10.1039/d3sm00139c), 2023-01-01
Supplement: d3sm00139c1.pdf [file d3sm00139c1.pdf]

# Convolutional Neural Network-based Colloidal Self-Assembly State Classification †

## SUPPLEMENTARY INFORMATION

Andres Lizano,<sup>a</sup> and Xun Tang<sup>a</sup>

<sup>a</sup> Cain Department of Chemical Engineering, Louisiana State University, Baton Rouge, LA 700803. E-mail: alizan2@lsu.edu

<sup>b</sup> Cain Department of Chemical Engineering, Louisiana State University, Baton Rouge, LA 700803. E-mail: xuntang@lsu.edu

**Table S1.** Number of trajectories simulated from the Brownian Dynamics simulation under each voltage level, and the time intervals for configuration sampling from each of the 1000s trajectory.

| V level/Time step | 5 s | 10 s | 30 s |
|-------------------|-----|------|------|
| 1                 | 2   | 25   | 0    |
| 2                 | 1   | 25   | 0    |
| 3                 | 2   | 30   | 0    |
| 4                 | 1   | 45   | 2    |

**Table S2.** Parameters for BD simulations. a. Particle diameter, b. absolute temperature, c. Debye screening length, d. particle and wall Stern potential, e. input levels, f. Clausius-Mosotti factor for an AC field frequency at 1 MHz, g. medium dielectric permittivity, h. electrode spacing, and i. number of particles in the batch system.

| Parameter                     | Value            |
|-------------------------------|------------------|
| $2\alpha(nm)^{[a]}$           | 2870             |
| $T(K)^{[b]}$                  | 298              |
| $\kappa^{-1}(nm)^{[c]}$       | 10               |
| $\psi(mV)^{[d]}$              | -50.0            |
| $\lambda^{[e]}$               | 0.2,0.9,2.0,19.7 |
| $f_{CM}^{[f]}$                | -0.4667          |
| $\epsilon_m/\epsilon_0^{[g]}$ | 78               |
| $d_g(\mu m)^{[h]}$            | 91               |
| $N^{[i]}$                     | 300              |

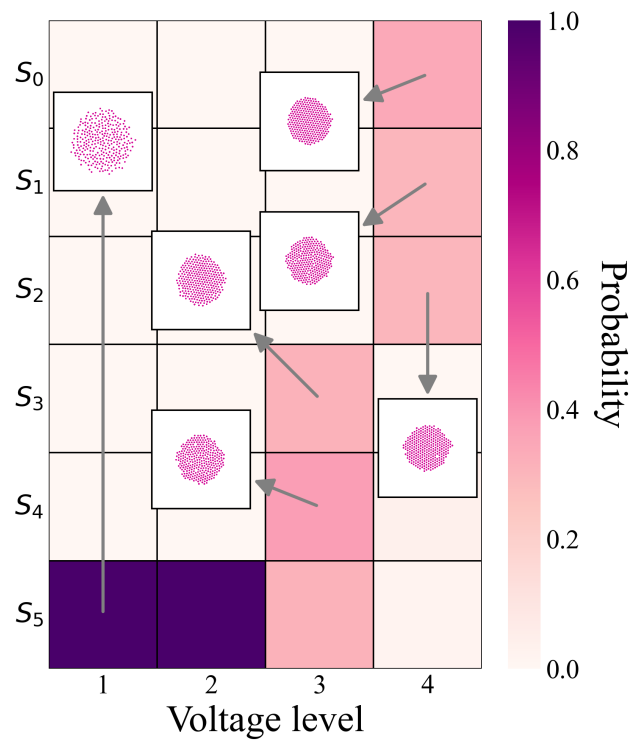

**Fig. S1.** Example of a phase diagram in terms of four discrete voltages with the proposed descriptor, indicating the transition of the system phase as a function of the controlling variable voltage.
